# Supplementary material
Source: Springer Nature journal article supplement (https://www.springermedizin.de/resource/supplementary/12967_2013_1759_MOESM7_ESM.pdf/9575252)

**A: Random Network (In-degree)**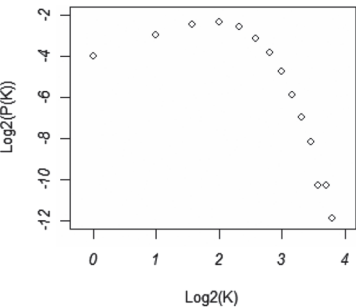**B: Random Network (Out-degree)**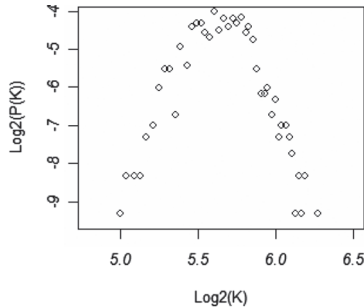**C: Real Network (In-degree)**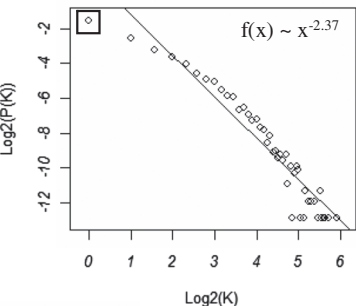**D: Real Network (Out-degree)**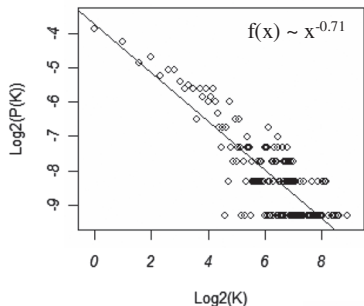

Supplement: MOESM7 [file 9575252]
